# Supplementary material for: Size matters: altering the metal-surface coordination in micropores via structural confinement effects
Source: Royal Society of Chemistry journal article supplement (doi:10.1039/d4qi01261e), 2024-01-01
Supplement: d4qi01261e1.pdf [file d4qi01261e1.pdf]

## Supporting Information

### **Size Matters: Altering the Metal-Surface Coordination in Micropores via Structural Confinement Effects**

Scott A. Southern<sup>a</sup>, Austin Thompson<sup>b</sup>, Aaron D. Sadow<sup>a,b</sup>, and Frédéric A. Perras<sup>\*a,b</sup>

- a. Chemical and Biological Sciences Division, Ames National Laboratory, Ames, IA 50011 (USA)
- b. Department of Chemistry, Iowa State University, Ames, IA 50011 (USA)

Correspondence: [fperras@ameslab.gov](mailto:fperras@ameslab.gov)

## Table of Contents

|                                                                                                             |    |
|-------------------------------------------------------------------------------------------------------------|----|
| 1. Simulation of PARS Spectra with Intermediate Dynamics .....                                              | 3  |
| 1.1. Typical Input Parameters.....                                                                          | 3  |
| 1.2. Simulation of PARS Spectra with Intermediate Dynamics .....                                            | 3  |
| 2. Supplementary Synthetic Methods.....                                                                     | 4  |
| 3. Supplementary Tables and Figures.....                                                                    | 6  |
| 3. DFT Calculations .....                                                                                   | 17 |
| 3.1. Example ADF input file .....                                                                           | 17 |
| 3.2. Geometry optimized coordinates of $\text{Sc}\{\kappa^2\text{-(NPh)}_2\text{CH}\}_2/\text{SiO}_2$ ..... | 18 |
| 4. Supplementary References .....                                                                           | 19 |

# 1. Simulation of PARS Spectra with Intermediate Dynamics

## 1.1. Typical Input Parameters

We employed a fitting procedure using a homebuilt C/C++ program we developed to simulate dipolar coupling doublets pairs of nuclei experiencing dynamic jump motions. Powder averaging was accomplished using 2000 orientations generated using the REPULSION scheme.<sup>1</sup> Each experimental doublet, representing  $C_2$  jump dynamics, was simulated using a  $^{13}\text{C}$ - $^1\text{H}$  dipolar coupling constant of 23.2 kHz, and an exchange constant,  $k$ , calculated using the Eyring equation for the specific sample temperature and activation energy,  $E_A$ . The modeling approach is described in greater detail in section 1.2.

## 1.2. Simulation of PARS Spectra with Intermediate Dynamics

PARS spectra containing dynamics of intermediate timescale were simulated assuming a 2-site exchange model that can be treated analytically.<sup>2</sup> We assume a static orientation of the 2-site system where the dipolar coupling constant is scaled by the recoupling sequence's (wR18<sub>2</sub><sup>5</sup>) scaling factor ( $\kappa=0.223$ ) and the exchange occurs at a rate of  $k$ . The exchange matrix is given by.

$$L = \begin{bmatrix} i\kappa\omega_{D,A} - k & k \\ k & i\kappa\omega_{D,B} - k \end{bmatrix}$$

where  $\omega_{D,A}$  and  $\omega_{D,B}$  are the dipolar frequencies associated with both orientations.

$$\omega_{D,A} = 2\pi D(3\cos^2\beta - 1)$$

The NMR signals evolves as  $\exp(\mathbf{L})$  which produces two Lorentzians:

$$l_1 = e^{-kt} e^{i\bar{\omega}t} e^{-\frac{t}{2}\sqrt{4k^2 - \omega_\Delta^2}}$$

$$l_2 = e^{-kt} e^{i\bar{\omega}t} e^{\frac{t}{2}\sqrt{4k^2 - \omega_\Delta^2}}$$

where,

$$\bar{\omega} = (\kappa\omega_{D,A} + \kappa\omega_{D,B})/2$$

$$\omega_\Delta = \kappa\omega_{D,A} - \kappa\omega_{D,B}$$

These Lorentzians have linewidths characterized by  $R_2$  values of:

$$R_2 = \begin{cases} k & \omega_\Delta^2 \geq 4k^2 \\ k - \frac{1}{2}\sqrt{4k^2 - \omega_\Delta^2} & \omega_\Delta^2 < 4k^2 \end{cases}$$

To simulate  $R$ -symmetry lineshapes, we then adopt the appropriate orientational dependence for the recoupled lineshape

$$f \propto \kappa D(3\sin^2\beta + \eta\cos 2\alpha(1 + \cos\beta)^2/2)$$

and introduce two conditions, namely, whether the dynamics are faster or slower than the resonance frequency differed in that powder orientation.

$$e^{i(f_X)t} e^{R_2 t} = \begin{cases} e^{if_X t} e^{kt} & \omega_\Delta^2 \geq 4k^2 \\ e^{if_X t} e^{\left(k + \frac{1}{2}\sqrt{4k^2 - \omega_\Delta^2}\right)t} & \omega_\Delta^2 < 4k^2 \end{cases}$$

This is an approximation of the expected lineshape but enables for the accurate simulation of coalescence in  $R$ -symmetry-based dipolar recoupling experiments. Powder averaging over Euler angles is then performed and a Fourier transform is applied to convert the time dependence described above into the recoupled lineshapes.

## 2. Supplementary Synthetic Methods

**General.** Dry solvents were obtained from an Innovative Technologies solvent purification system and stored over molecular sieves under inert gas. Benzene- $d_6$  was dried by stirring over NaK followed by vacuum transfer. Aniline was purchased from Sigma-Aldrich and was used as received. Potassium hydride (Sigma-Aldrich) suspended in mineral oil was washed with dry pentane, dried in vacuo, and stored in an  $N_2$ -filled glovebox. Anhydrous  $LaCl_3$ ,  $ScCl_3$ , and  $YCl_3$  were obtained from Strem Chemicals and used as received.  $Sc\{\kappa^2-(N^iPr)_2CH\}_3$  was obtained from Strem and sublimed before use. Triethyl orthoformate (formyl- $^{13}C$ , 99%) and aniline ( $^{13}C_6$ , 99%) were obtained from Cambridge Isotope Laboratories and used as received. Solution-state NMR spectra were acquired on either a Bruker AVIII-600 or a Bruker NEO-400 spectrometer. Spectra were calibrated with reference to the residual  $^1H$  signal in the deuterated solvent. Fourier transform infrared spectroscopy (FTIR) and diffuse reflectance infrared Fourier transform spectroscopy (DRIFTS) were acquired using a Bruker Vertex 80 spectrometer. Silica supports (Sigma-Aldrich) were calcined at 500 °C under air for 12 h (ramp rate 2 °C/min), partially dehydroxylated under dynamic vacuum at 550 °C for 12 h (ramp rate 2 °C/min) and stored in an  $N_2$ -filled glovebox. The silanol content in the silica materials was measured by NMR titration using the protonation of  $Bn_2Mg$  to form toluene in benzene- $d_6$  with tetrakis(trimethylsilyl)silane (TMSS) as an internal standard of known concentration.

Metal loadings were determined by solution-state NMR. Briefly, amidinate complexes were first dissolved in a Youngs tap fitted NMR tube using benzene- $d_6$  with TMSS as an internal standard. Using this standard, the millimoles (mmol) of the complex was determined by  $^1H$  NMR integration. A known amount of silica (based on silanol concentration, 0.9 equiv.) was then added to the NMR tube and allowed to mix for 24 h. Following this reaction, the residual concentration of the free metal complex was again quantified to determine the mmol of the complex that was consumed.

Physisorption isotherms were measured in a Micromeritics Tristar surface area and porosity analyzer. The surface area was calculated by the Brunauer-Emmett-Teller (BET) method.

**Yttrium tris[ $N,N'$ -bis(phenyl- $^{13}C_6$ )formamidate- $^{13}C_{13}$ ] ( $Y\{\kappa^2-(NPh)_2CH-^{13}C_{13}\}_3$ ).**  $YCl_3$  (0.045 g, 0.230 mmol, 1 equiv.) was suspended in anhydrous THF (8 mL) and stirred vigorously. A THF solution of  $K[(NPh)_2CH-^{13}C_{13}]$  (0.164 g, 0.690 mmol, 3 equiv.) was added in a dropwise fashion to the stirring suspension. The reaction mixture became increasingly turbid as it was stirred for 12 h. The solution was filtered through a 0.45  $\mu m$  glass fiber filter, and the solvent removed *in vacuo*. The residue was lyophilized by dissolving in benzene (5 mL), freezing the solution, and subliming the benzene *in vacuo* to yield  $Y\{\kappa^2-(NPh)_2CH-^{13}C_{13}\}_3$  (0.146 g, 92.5%) as a pale-yellow solid, which was used without further purification.  $^1H$  NMR (400 MHz, benzene- $d_6$ ):  $\delta$  7.82 (d,  $^1J_{CH} = 173.6$  Hz, 3 H, formyl  $^{13}CH$ ), 7.10 (vt,  $^1J_{CH} = 155$  Hz (satellite),  $^3J_{HH} = 8$  Hz, 12 H, *meta*- $C_6H_5$ ), 6.9 (m, 18 H, *ortho/para*- $C_6H_5$ ).  $^{13}C\{^1H\}$  NMR (100.6 MHz, benzene- $d_6$ ):  $\delta$  149.5 (br s, formyl  $^{13}CH$ ), 146.1 (t,  $^1J_{CC} = 61.6$  Hz, *ipso*- $C_6H_5$ ), 129.5 (td,  $^1J_{CC} = 56.9$ ,  $^3J_{CC} = 7.1$  Hz, *meta*- $C_6H_5$ ), 123.3 (td,  $^1J_{CC} = 56.1$  Hz,  $^3J_{CC} = 9.5$  Hz, *para*- $C_6H_5$ ), 119.6 (vt,  $^1J_{CC} = 58.9$  Hz, *ortho*- $C_6H_5$ ).

**Lanthanum tris[ $N,N'$ -bis(phenyl- $^{13}C_6$ )formamidate- $^{13}C_{13}$ ] ( $La\{\kappa^2-(NPh)_2CH-^{13}C_{13}\}_3$ ).**  $La\{\kappa^2-(NPh)_2CH-^{13}C_{13}\}_3$  was prepared following the procedure described for  $Y\{\kappa^2-(NPh)_2CH-^{13}C_{13}\}_3$ .  $LaCl_3$  (0.040 g, 0.163 mmol, 1 equiv.) and  $K[(NPh)_2CH-^{13}C_{13}]$  (0.117 g, 0.492 mmol, 3 equiv.) were combined to afford  $La\{\kappa^2-(NPh)_2CH-^{13}C_{13}\}_3$  (0.107 g, 89.2%) as a pale-yellow solid.  $^1H$  NMR (400 MHz, benzene- $d_6$ ):  $\delta$  8.378 (d,  $^1J_{CH} = 162.4$  Hz, 3 H, formyl  $^{13}CH$ ), 7.21 (t,  $^1J_{CH} = 154$  Hz (satellite),  $^3J_{HH} = 8.0$  Hz, 12 H, *meta*- $C_6H_5$ ), 6.92 (m, 18 H, *ortho/para*- $C_6H_5$ ).  $^{13}C\{^1H\}$  NMR (100.6 MHz, benzene- $d_6$ ):  $\delta$  156.9 (s, formyl  $^{13}CH$ ), 151.3 (t,  $^1J_{CC} = 62.3$  Hz, *ipso*- $C_6H_5$ ), 129.7 (td,  $^1J_{CC} = 57.3$  Hz,  $^3J_{CC} = 7.8$  Hz, *meta*- $C_6H_5$ ), 121.5 (td,  $^1J_{CC} = 55.8$  Hz,  $^3J_{CC} = 8.9$  Hz, *para*- $C_6H_5$ ), 120.0 (t,  $J = 59.9$  Hz, *ortho*- $C_6H_5$ ).

**Natural Abundance.**  $Y\{\kappa^2-(NPh)_2CH\}_3$ ,  $La\{\kappa^2-(NPh)_2CH\}_3$ , and  $Sc\{\kappa^2-(NPh)_2CH\}_3$ , at natural abundance, were synthesized in an analogous manner to that of the enriched species.

**Yttrium tris[ $N,N'$ -bis(phenyl)formamidate] tetrahydrofuran ( $Y\{\kappa^2-(NPh)_2CH\}_3 \cdot THF$ ).**  $YCl_3$  (0.198 g, 1.01 mmol, 1 equiv.) and  $K[(NPh)_2CH]$  (0.710 g, 3.03 mmol, 3 equiv.) afforded  $Y\{\kappa^2-(NPh)_2CH\}_3 \cdot THF$  as yellow solid (0.468 g, 61.8%).  $^1H$  NMR (600 MHz, benzene- $d_6$ ):  $\delta$  8.88 (s, 3 H, formyl), 7.08 (t,  $^3J_{HH} = 8.4$  Hz, 12 H, *meta*- $C_6H_5$ ), 6.96 (d,  $^3J_{HH} = 7.8$  Hz, 12 H, *ortho*- $C_6H_5$ ), 6.88 (t,  $^3J_{HH} = 7.2$  Hz, 6 H, *para*- $C_6H_5$ ).  $^{13}C\{^1H\}$  NMR (151 MHz, benzene- $d_6$ ):  $\delta$  163.9 (formyl), 149.2 (*ipso*- $C_6H_5$ ), 129.0 (*meta*- $C_6H_5$ ), 122.2 (*para*- $C_6H_5$ ), 120.2 (*ortho*- $C_6H_5$ ), 69.9 (THF), 24.7 (THF). IR (KBr,  $cm^{-1}$ ): 3053 w, 3031 w, 2910, w, 2890 w, 1649 m, 1587 m, 1527 s, 1485 s, 1385 m, 1288 s, 1218 m, 1172 w, 1152 w, 1076 w, 1027 w, 988 w, 944 w, 897 w, 868 w, 831 w, 810 w, 758 s, 692 s. Anal. Calcd for  $C_{43}H_{41}N_6OY$ : C, 69.16; H, 5.53; N, 11.25. Found: C, 68.98; H, 5.45; N, 11.09.

**Lanthanum tris[ $N,N'$ -bis(phenyl)formamidate] ( $La\{\kappa^2-(NPh)_2CH\}_3$ ).**  $LaCl_3$  (0.258 g, 1.05 mmol, 1 equiv.) and  $K[(NPh)_2CH]$  (0.738 g, 3.15 mmol, 3 equiv.) were combined to afford  $La\{\kappa^2-(NPh)_2CH\}_3$  (0.539 g, 68.7%) as a pale-yellow solid.  $^1H$  NMR (600 MHz, benzene- $d_6$ ):  $\delta$  8.62 (s, 3 H, formyl), 7.26 (t,  $^3J_{HH} = 7.2$  Hz, 12 H, *meta*- $C_6H_5$ ), 6.93 (m, 18 H, *ortho/para*- $C_6H_5$ ).  $^{13}C\{^1H\}$  NMR (151 MHz, benzene- $d_6$ ):  $\delta$  160.4 (formyl), 153.6 (*ipso*- $C_6H_5$ ), 129.8 (*meta*- $C_6H_5$ ), 120.8 (*para*- $C_6H_5$ ), 120.3 (*ortho*- $C_6H_5$ ). IR (KBr,  $cm^{-1}$ ): 3051 w, 3020 w, 1679 w, 1650 m, 1558 m, 1529 s, 1476 s, 1385 w, 1324 s, 1220 m, 1205 m, 1170 m, 1152 w, 1075 w, 1024 w, 986 s, 917 w, 887 w, 831 w, 804 w, 764 s, 697 s, 619 w, 524 m. Anal. Calcd for  $C_{39}H_{33}N_6La$ : C, 64.64; H, 5.59; N, 11.60. Found: C, 64.51; H, 5.57; N, 11.22.

**Scandium tris[*N,N'*-bis(phenyl)formamidate] ( $\text{Sc}\{\kappa^2\text{-(NPh)}_2\text{CH}\}_3$ ).**  $\text{ScCl}_3$  (0.157 g, 1.04 mmol, 1 equiv.) and  $\text{K}[(\text{NPh})_2\text{CH}]$  (0.731 g, 3.12 mmol, 3 equiv.) afforded  $\text{Sc}\{\kappa^2\text{-(NPh)}_2\text{CH}\}_3$  (0.431 g, 65.7%) as a pale-yellow solid.  $^1\text{H}$  NMR (600 MHz, benzene- $d_6$ ):  $\delta$  8.27 (broad singlet, 3 H, formyl), 7.08 (t,  $^3J_{\text{HH}} = 7.8$  Hz, 12 H, *meta*- $\text{C}_6\text{H}_5$ ), 6.90 (m, 18 H, *ortho/para*- $\text{C}_6\text{H}_5$ ).  $^{13}\text{C}\{^1\text{H}\}$  NMR (151 MHz, benzene- $d_6$ ):  $\delta$  154.2 (br, formyl C-H), 146.4 (br, *ipso*- $\text{C}_6\text{H}_5$ ), 129.5 (*meta*- $\text{C}_6\text{H}_5$ ), 123.4 (*para*- $\text{C}_6\text{H}_5$ ), 119.8 (*ortho*- $\text{C}_6\text{H}_5$ ). IR (KBr,  $\text{cm}^{-1}$ ): 3053 w, 2029 w, 2918 w, 2852 w, 1651 s, 1587 s, 1524 s, 1487 s, 1384 m, 1287 s, 1225 m, 1208 w, 1172 w, 1154 w, 1076 w, 1026 w, 999 w, 986 w, 953 w, 898 w, 806 w, 756 s, 695 s. Anal. Calcd for  $\text{C}_{39}\text{H}_{36}\text{N}_6\text{Sc}$ : C, 74.27; H, 5.27; N, 13.33. Found: C, 73.95; H, 5.21; N, 13.56.

### 3. Supplementary Tables and Figures

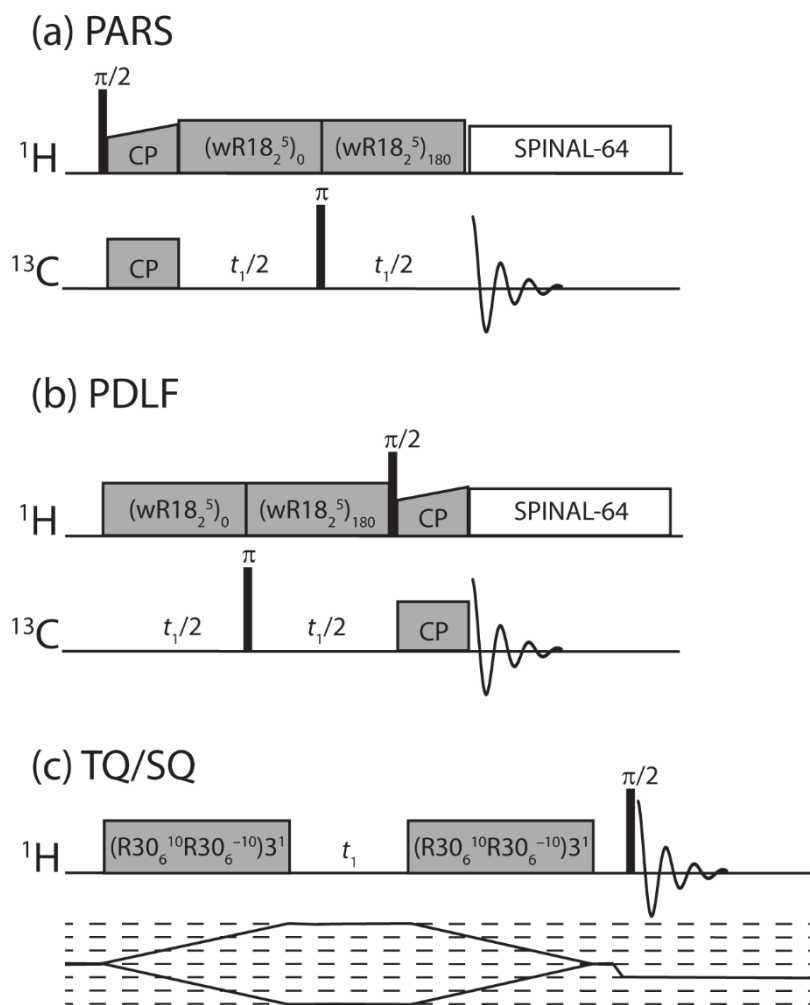

**Figure S1.** Specialised NMR pulse sequences used in the study: (a) PARS, (b) PDLF, and (c) TQ/SQ.

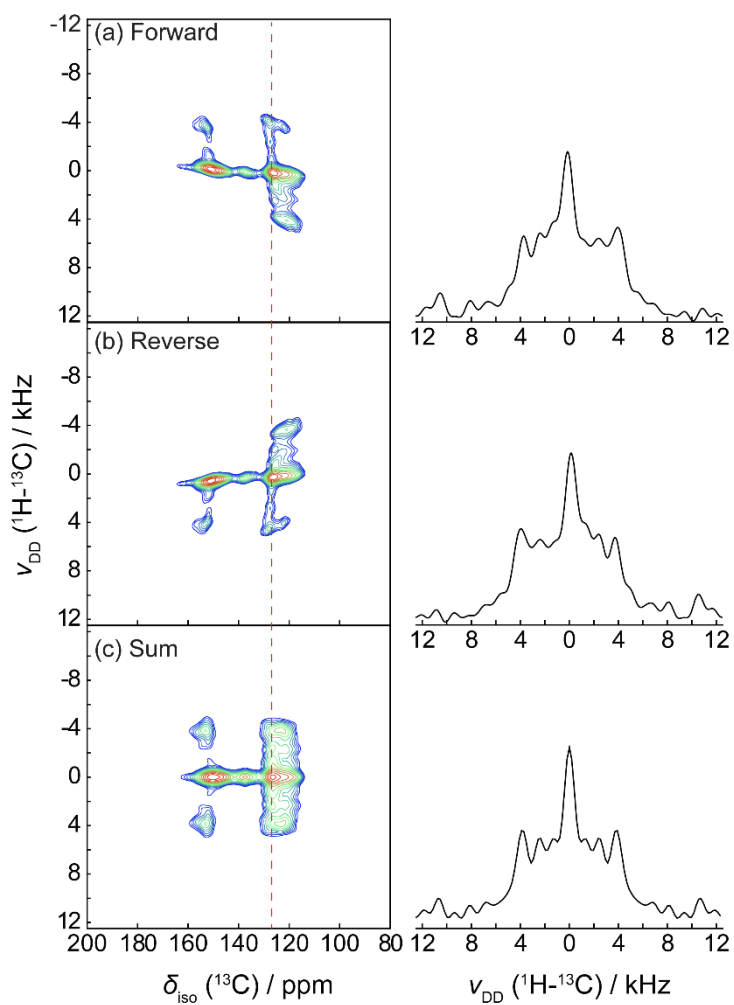

**Figure S2.** Representative process for obtaining cosine-transformed 2D separated local field spectra. Inverted (b) and non-inverted (a) QF-processed 2D spectra and their sum (c), which is mathematically equivalent to a pure-cosine transformation when no phase corrections are applied. PARS and PDLF data are pure cosine modulated and are best represented by cosine-transformations. The red dashed line indicates the area from which the slices shown to the right are taken.

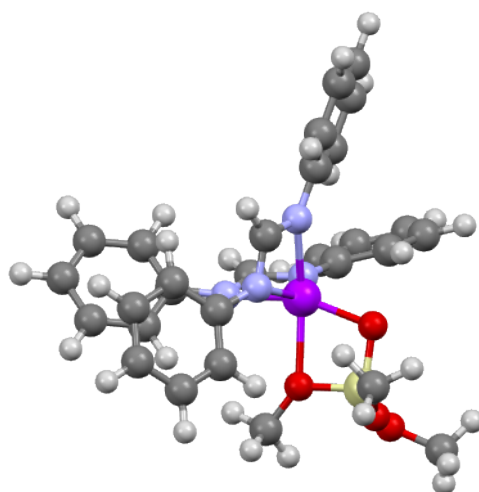

**Figure S3** Geometry-optimized DFT cluster model structure of  $\text{Sc}\{\kappa^2\text{-(NPh)}_2\text{CH}\}_2/\text{SiO}_2$

**Table S1.** Silanol content in partially dehydroxylated silica.

| Silica                    | SiOH (mmol/g)  | -OH nm <sup>-2</sup> |
|---------------------------|----------------|----------------------|
| Davisil, Grade 643, 150 Å | 0.094 ± 0.0056 | 0.095                |
| Davisil, Grade 635, 60 Å  | 0.62 ± 0.0092  | 1.44                 |
| Davisil Grade 923, 30 Å   | 0.41 ± 0.028   | 0.53                 |
| Davisil, Grade 12, 22 Å   | 0.097 ± 0.0065 | 0.094                |

**Table S2:** <sup>1</sup>H NMR determined metal loadings.<sup>a</sup>

| Silica                    | Y{κ <sup>2</sup> -(NPh) <sub>2</sub> CH} <sub>3</sub> | La{κ <sup>2</sup> -(NPh) <sub>2</sub> CH} <sub>3</sub> | Sc{κ <sup>2</sup> -(NPh) <sub>2</sub> CH} <sub>3</sub> | Sc{κ <sup>2</sup> -(N <sup>i</sup> Pr) <sub>2</sub> CH} <sub>3</sub> |
|---------------------------|-------------------------------------------------------|--------------------------------------------------------|--------------------------------------------------------|----------------------------------------------------------------------|
| Davisil, Grade 643, 150 Å | --                                                    | --                                                     | 0.062 <sup>b</sup>                                     | --                                                                   |
| Davisil, Grade 635, 60 Å  | 0.253                                                 | 0.225                                                  | 0.254                                                  | 0.473                                                                |
| Davisil, Grade 923, 30 Å  | --                                                    | --                                                     | 0.170                                                  | --                                                                   |
| Davisil, Grade 12, 22 Å   | --                                                    | --                                                     | 0.018 <sup>b</sup>                                     | --                                                                   |

<sup>a</sup>mmol/g<sup>b</sup>Note that these two silica materials have lower OH densities, which led to lower metal loadings, see **Table S1**.**Table S3.** BET determined surface area and pore volume of the bare Davisil-type silicas and those measured after grafting Sc{κ<sup>2</sup>-(NPh)<sub>2</sub>CH}<sub>3</sub>.<sup>a</sup>

| Silica                    | Ungrafted Surface Area <sup>a</sup> | Grafted Surface Area <sup>a</sup> | Ungrafted Pore volume <sup>b</sup> | Grafted Pore Volume <sup>b</sup> |
|---------------------------|-------------------------------------|-----------------------------------|------------------------------------|----------------------------------|
| Davisil, Grade 643, 150 Å | 599.0                               | 488.4                             | 0.3099                             | 0.2583                           |
| Davisil, Grade 635, 60 Å  | 258.9                               | 286.8                             | 0.8928                             | 0.7599                           |
| Davisil, Grade 923, 30 Å  | 462.1                               | 345.4                             | 0.3397                             | 0.2535                           |
| Davisil, Grade 12, 22 Å   | 621.2                               | 472.1                             | 0.3017                             | 0.2475                           |

<sup>a</sup>m<sup>2</sup>/g, <sup>b</sup>cm<sup>3</sup>/g





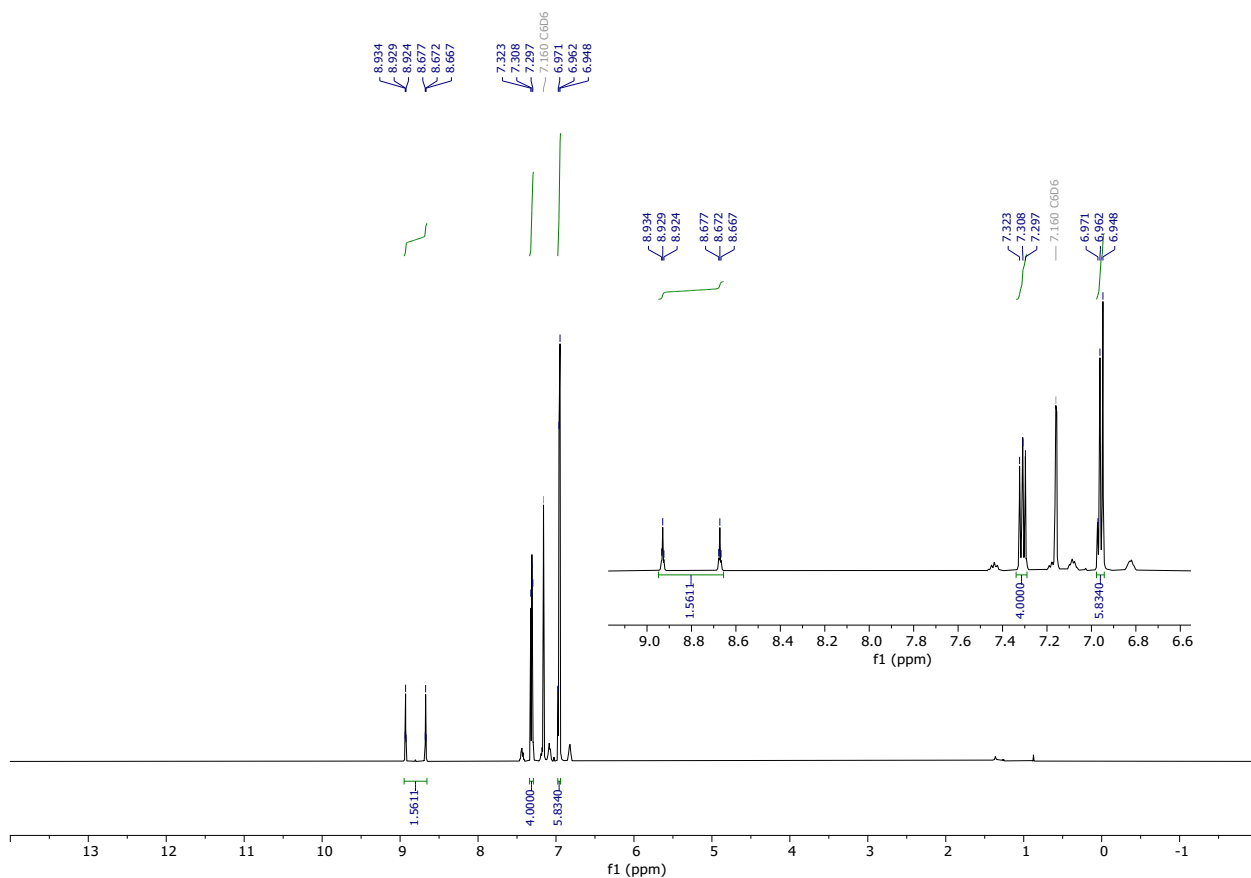

Figure S6.  $^1\text{H}$  NMR spectrum of potassium  $N,N'$ -bis(phenyl)formamidate- $^{13}\text{C}_{13}$  (benzene- $d_6$ ).

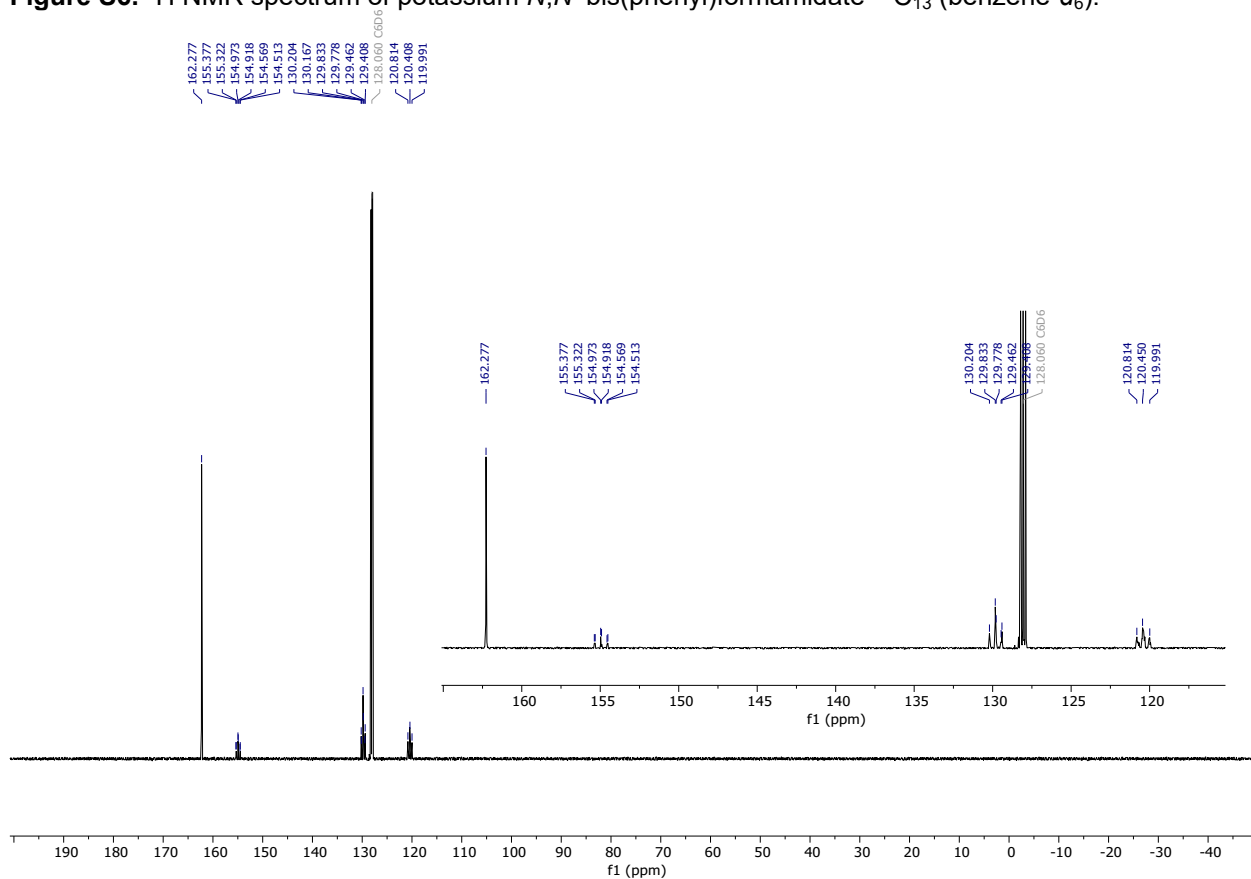

Figure S7.  $^{13}\text{C}\{^1\text{H}\}$  NMR spectrum of potassium  $N,N'$ -bis(phenyl)formamidate- $^{13}\text{C}_{13}$  (benzene- $d_6$ ).

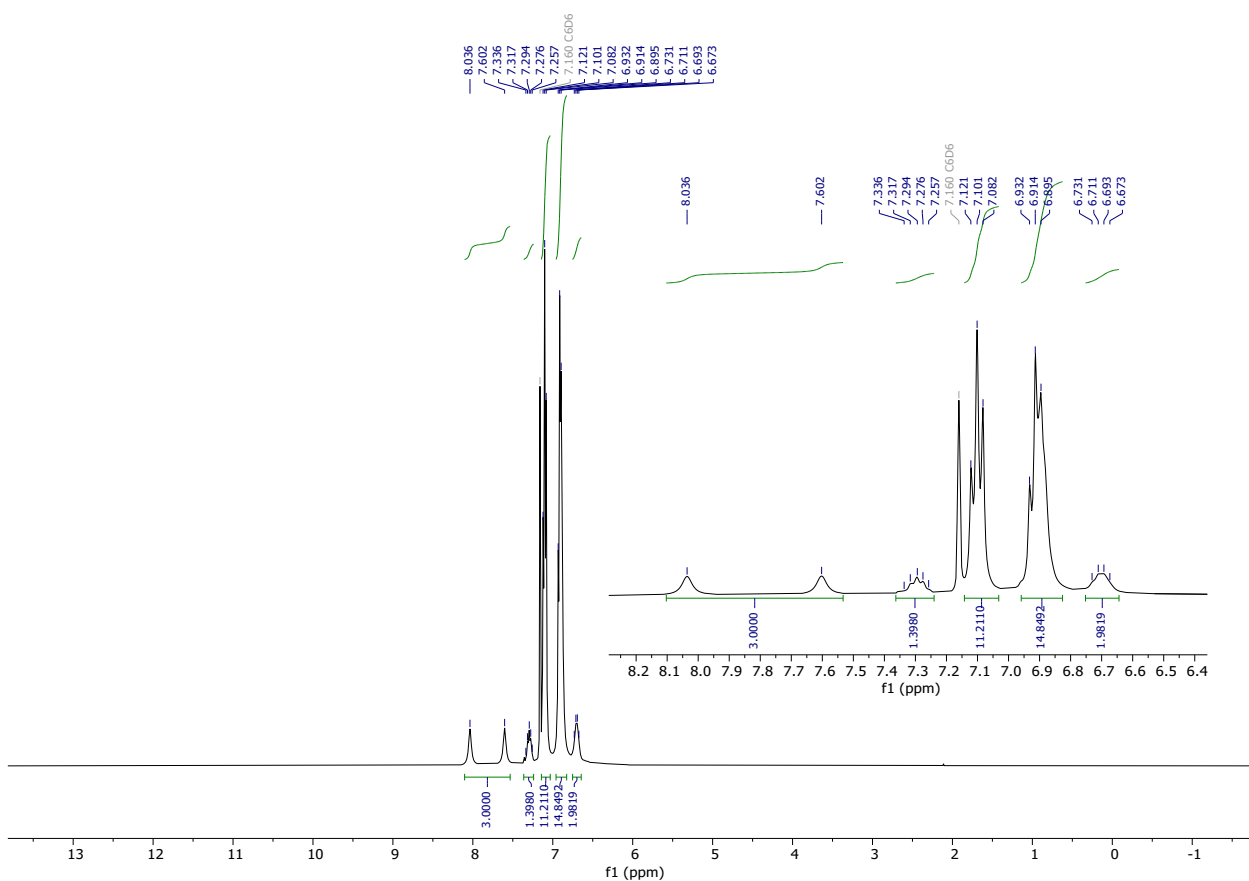

Figure S8.  $^1\text{H}$  NMR spectrum of  $\text{Y}\{\kappa^2\text{-(NPh)}_2\text{CH-}^{13}\text{C}_{13}\}_3$  in benzene- $d_6$ .

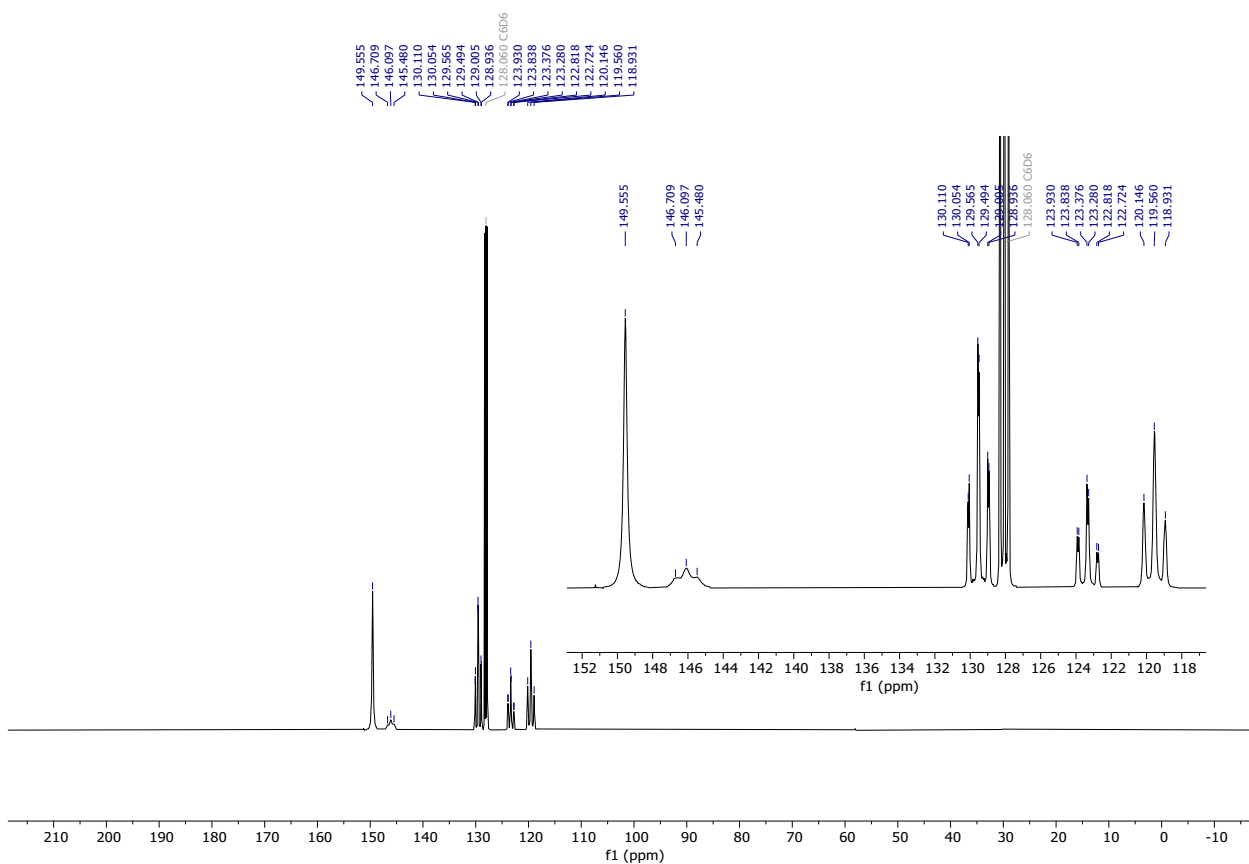

Figure S9.  $^{13}\text{C}\{^1\text{H}\}$  NMR spectrum of  $\text{Y}\{\kappa^2\text{-(NPh)}_2\text{CH-}^{13}\text{C}_{13}\}_3$  in benzene- $d_6$ .



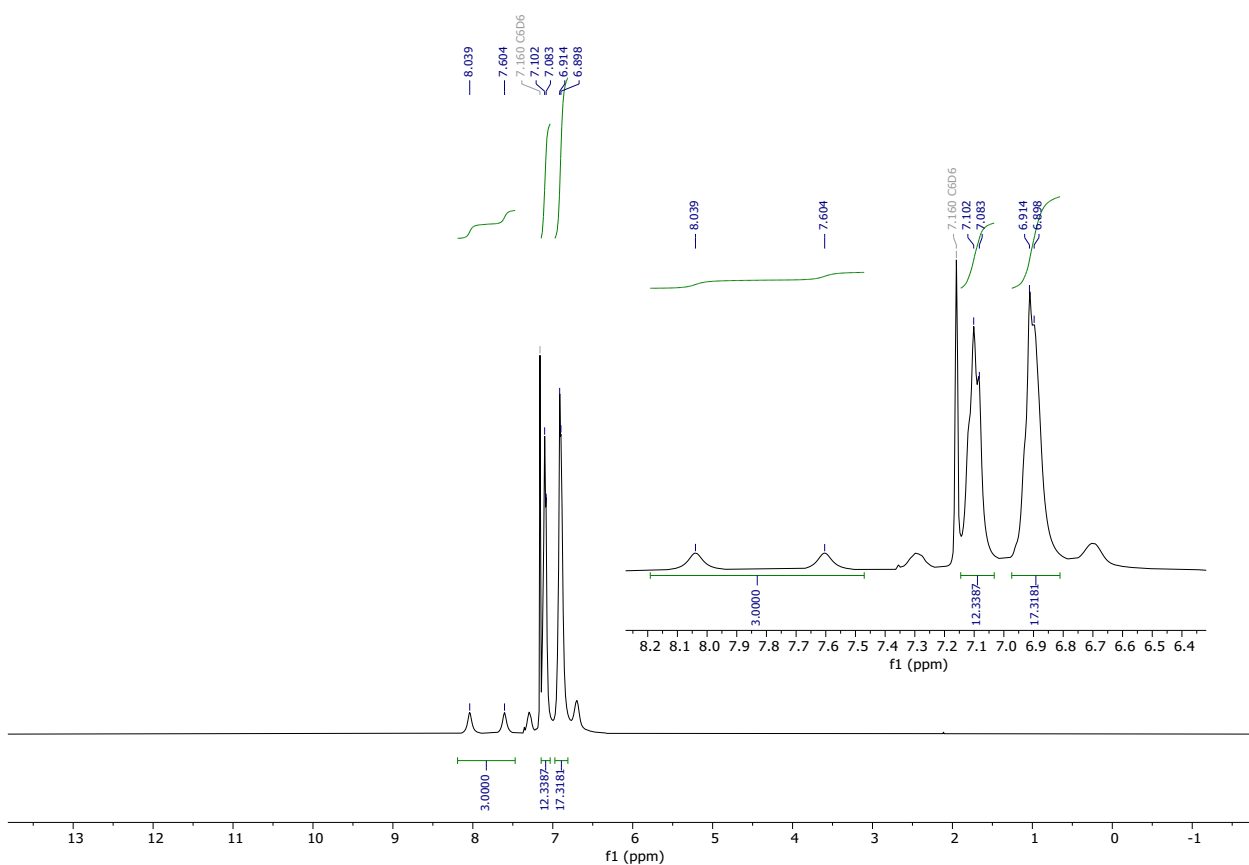

Figure S12.  $^1\text{H}$  NMR spectrum of  $\text{Sc}\{\kappa^2\text{-(NPh)}_2\text{CH-}^{13}\text{C}_{13}\}_3$  in benzene- $d_6$ .

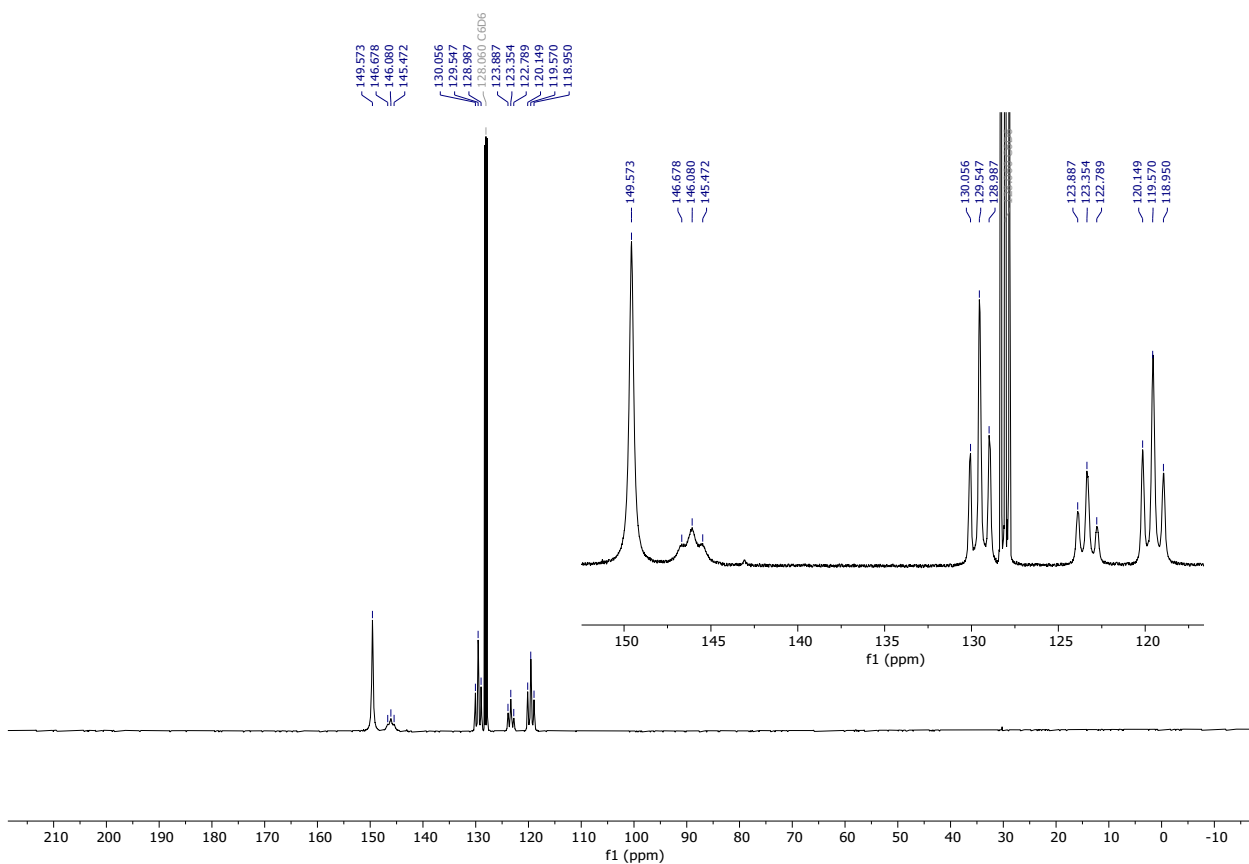

Figure S13  $^{13}\text{C}\{^1\text{H}\}$  NMR spectrum of  $\text{Sc}\{\kappa^2\text{-(NPh)}_2\text{CH-}^{13}\text{C}_{13}\}_3$  in benzene- $d_6$ .

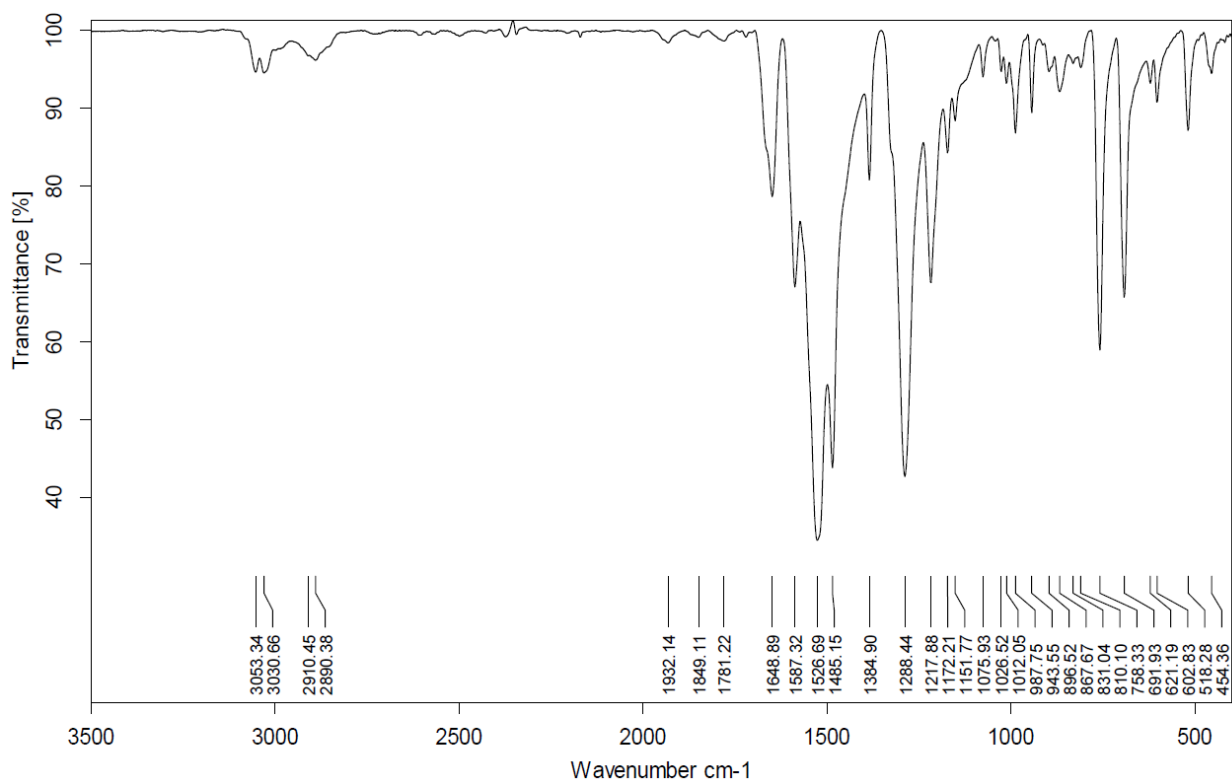

**Figure S14.** Infrared spectrum of  $Y\{\kappa^2-(NPh)_2CH\}_3$  (KBr).

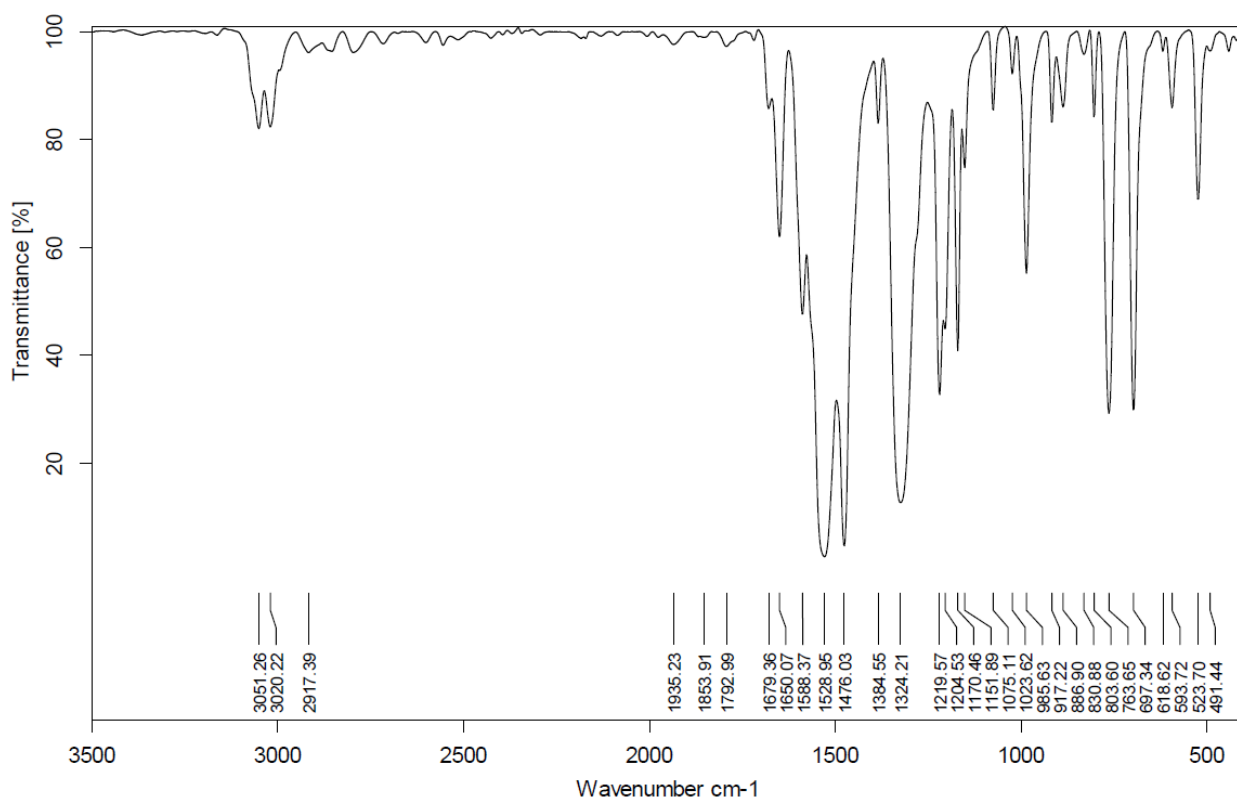

**Figure S15.** Infrared spectrum of  $La\{\kappa^2-(NPh)_2CH\}_3$  (KBr).

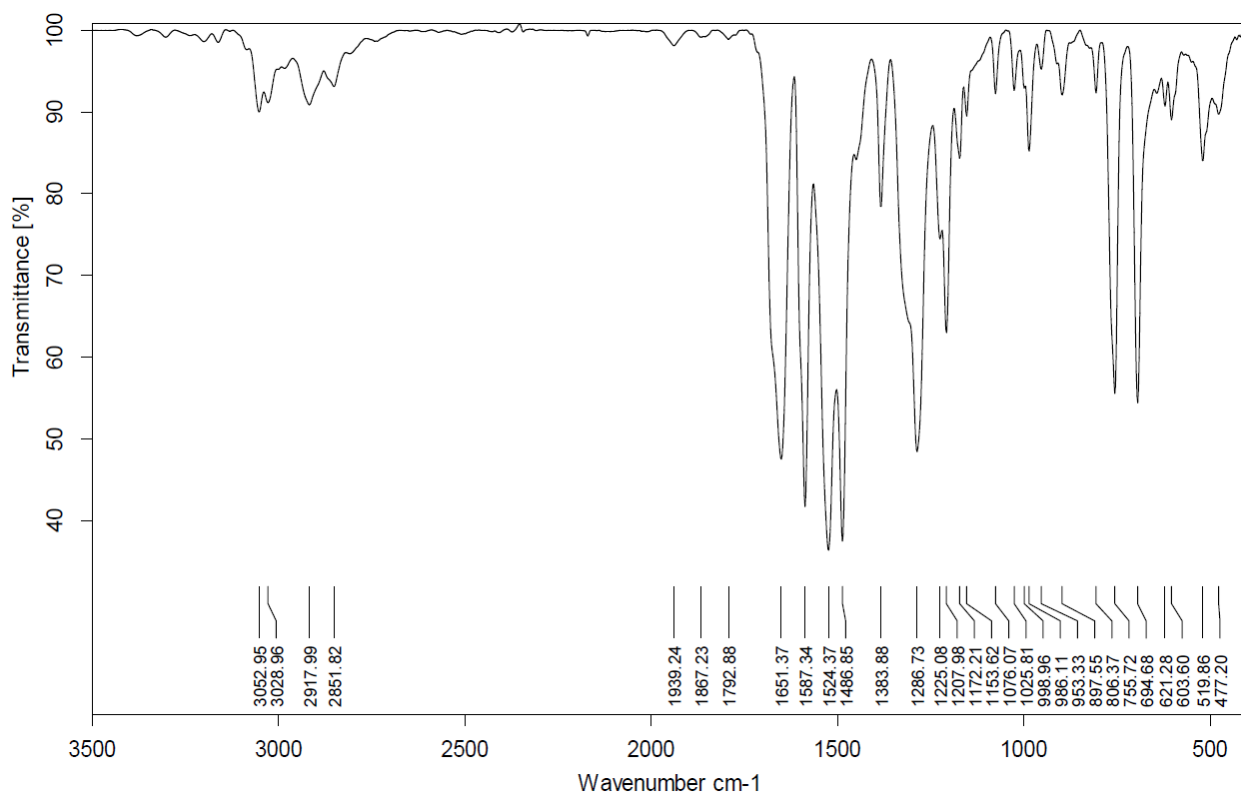

**Figure S16.** Infrared spectrum of  $\text{Sc}\{\kappa^2\text{-(NPh)}_2\text{CH}\}_3$  (KBr).

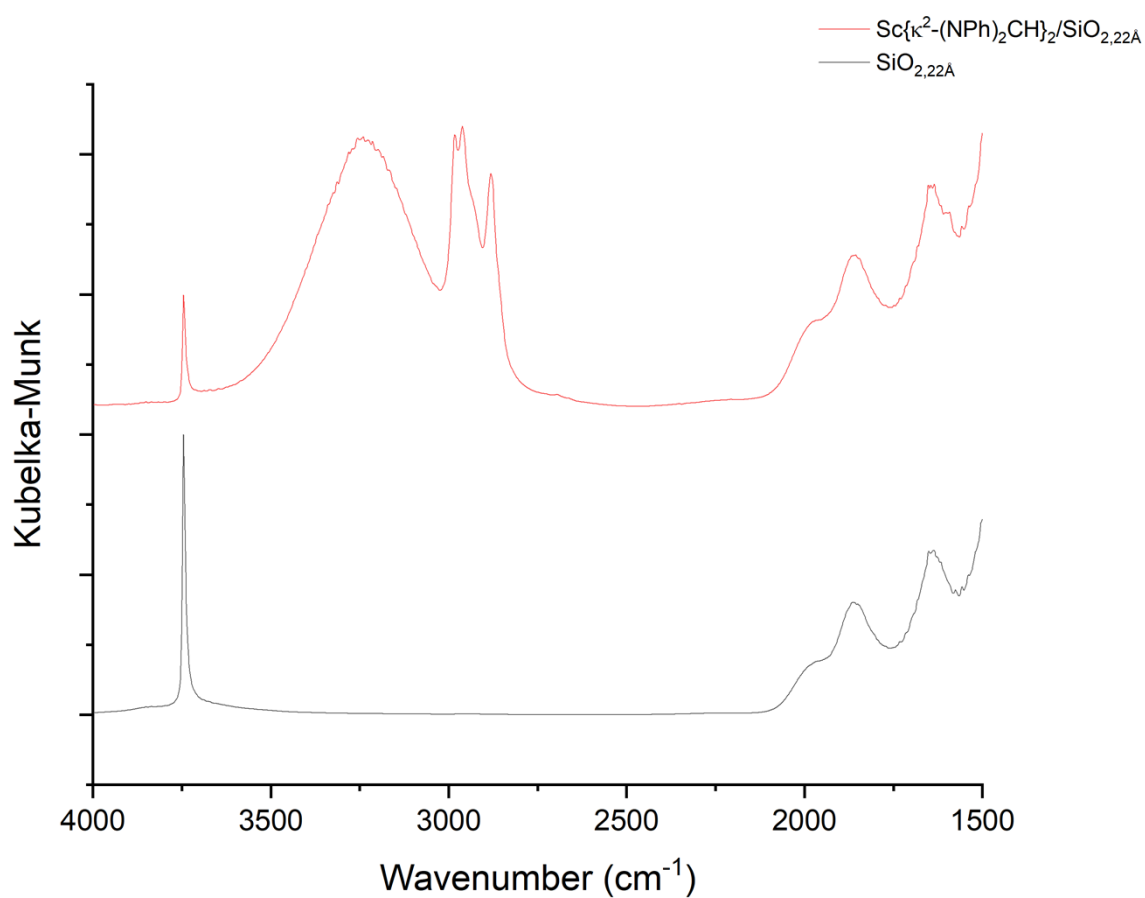

**Figure S17.** DRIFTS of  $\text{SiO}_{2,22\text{\AA}}$  and  $\text{Sc}\{\kappa^2\text{-(NPh)}_2\text{CH}\}_2/\text{SiO}_{2,22\text{\AA}}$ .

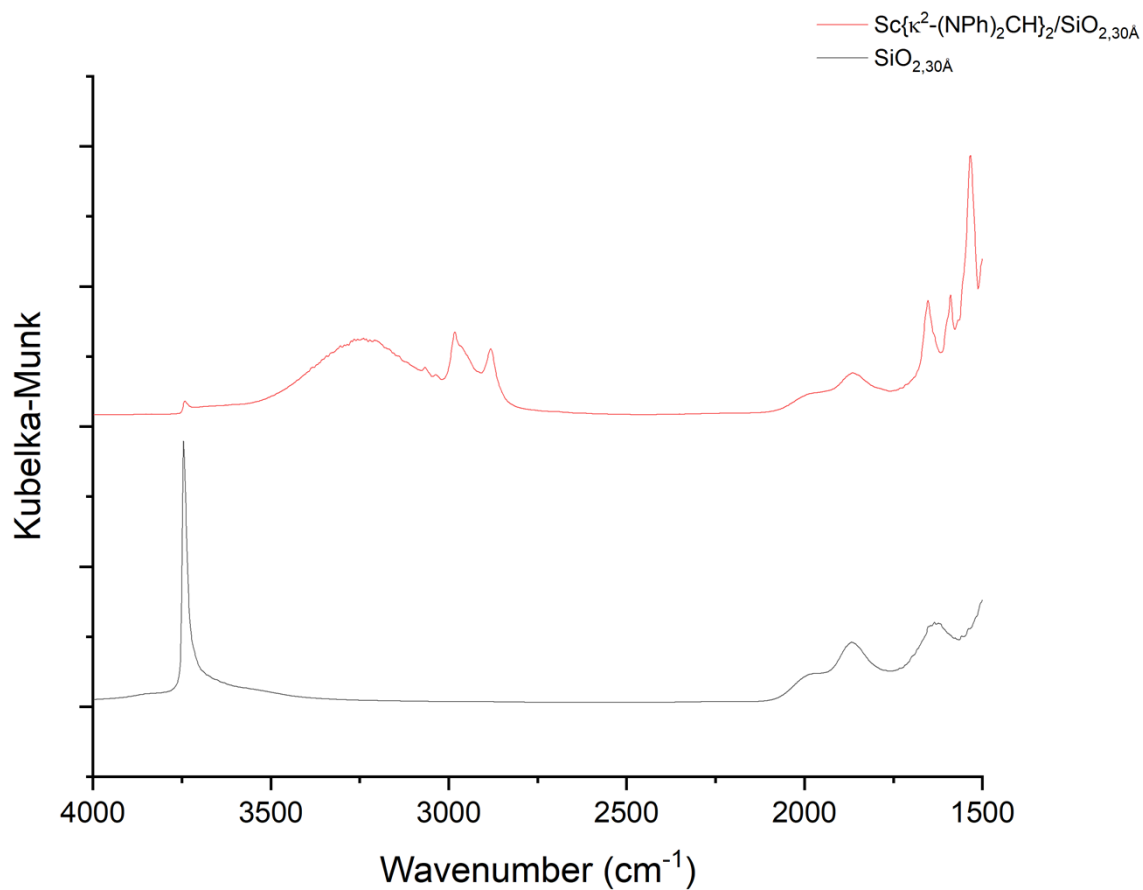

**Figure S18.** DRIFTS of SiO<sub>2,30Å</sub> and Sc{k<sup>2</sup>-(NPh)<sub>2</sub>CH<sub>2</sub>}/SiO<sub>2,30Å</sub>.

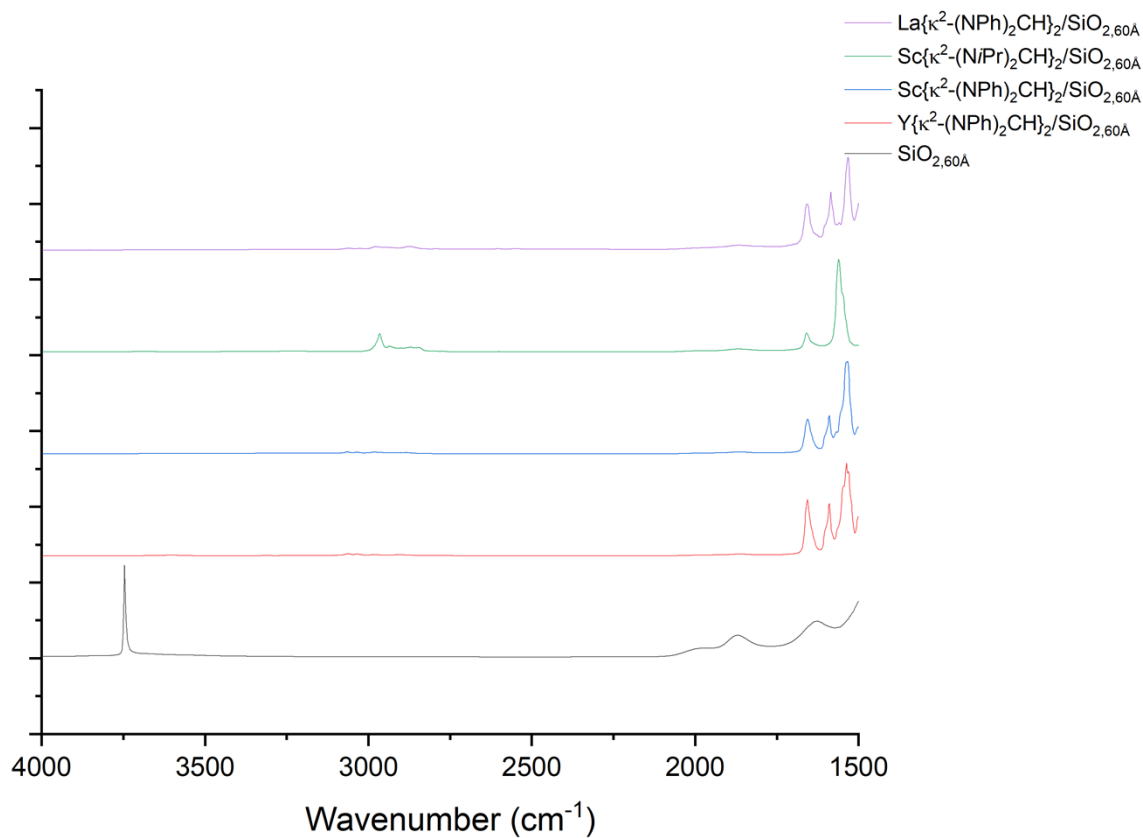



**Figure S19.** DRIFTS of  $\text{SiO}_{2,60\text{\AA}}$ ,  $\text{Y}\{\kappa^2\text{-(NPh)}_2\text{CH}\}_2/\text{SiO}_{2,60\text{\AA}}$ ,  $\text{Sc}\{\kappa^2\text{-(NPh)}_2\text{CH}\}_2/\text{SiO}_{2,60\text{\AA}}$ ,  $\text{Sc}\{\kappa^2\text{-(NiPr)}_2\text{CH}\}_2/\text{SiO}_{2,60\text{\AA}}$ , and  $\text{La}\{\kappa^2\text{-(NPh)}_2\text{CH}\}_2/\text{SiO}_{2,60\text{\AA}}$ .

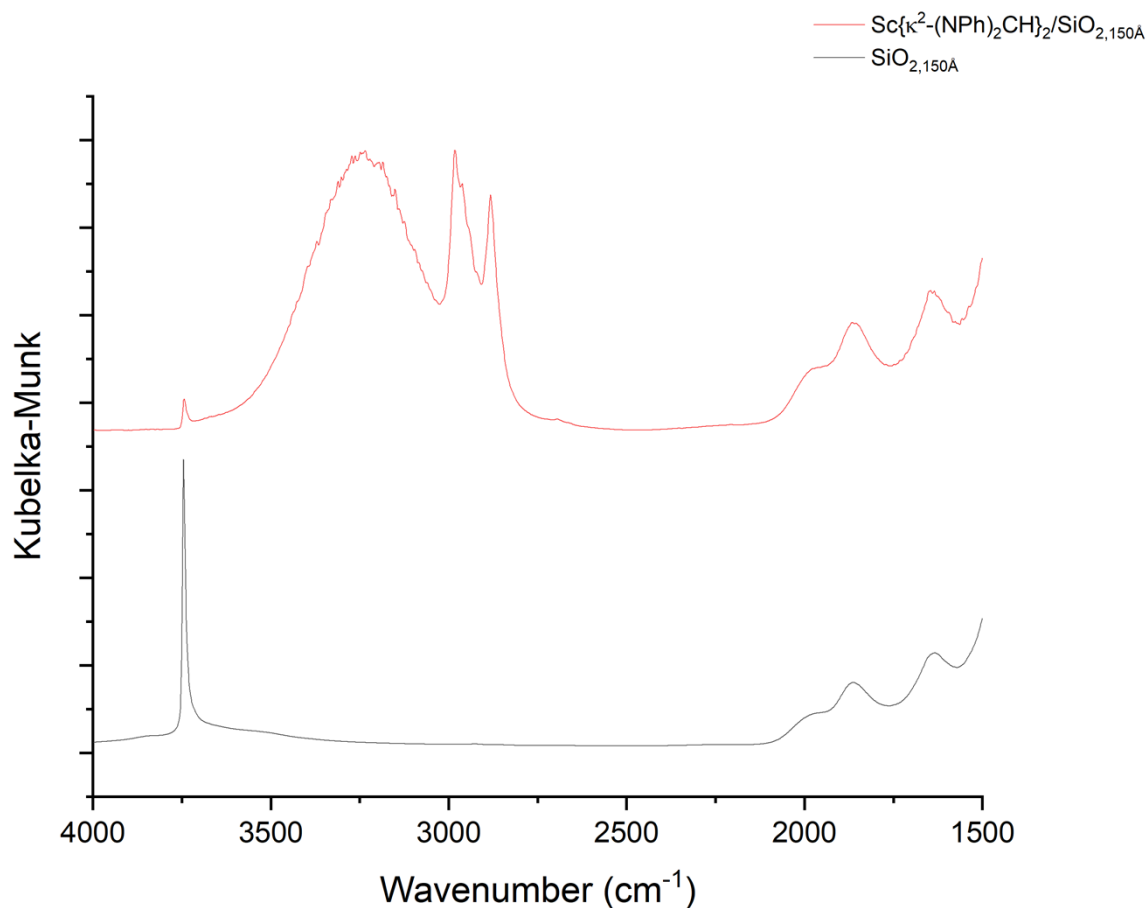

**Figure S20.** DRIFTS of  $\text{SiO}_{2,150\text{\AA}}$  and  $\text{Sc}\{\kappa^2\text{-(NPh)}_2\text{CH}\}_2/\text{SiO}_{2,150\text{\AA}}$ .

### 3. DFT Calculations

#### 3.1. Example ADF input file

The list of constraints and atomic coordinates are omitted for clarity.

```
#!/bin/sh

"$AMSBIN/ams" << eor

Task GeometryOptimization
Constraints
  [placeholder]
End
System
  Atoms
  [placeholder]
End
End

Engine ADF
  Basis
  Type TZP
  Core None
  PerAtomType Symbol=Sc File=ZORA/TZ2P+/Sc
End
```

```

Save TAPE10
XC
  Hybrid PBE
  Dispersion Grimme4
End
Relativity
  Level Spin-Orbit
End
Symmetry NOSYM
NumericalQuality VeryGood
EndEngine
eor

```

### 3.2. Geometry optimized coordinates of $Sc\{\kappa^2-(NPh)_2CH\}_2/SiO_2$

70

C29H31N4O4ScSi optimized with ADF in AMS.

|    |                   |                   |                   |
|----|-------------------|-------------------|-------------------|
| C  | 13.48138496761232 | 16.78676126217711 | 10.60468429496014 |
| H  | 11.13721324669378 | 15.87385684142458 | 12.46945349074984 |
| H  | 13.91854224292237 | 20.15905145038104 | 10.90910712551451 |
| N  | 15.04113659646595 | 17.46481565033228 | 16.29935609347080 |
| H  | 16.92877332971764 | 18.43557885111280 | 16.00499194109601 |
| H  | 12.91116285799560 | 11.41263586328272 | 16.06902330211137 |
| H  | 16.14234856417730 | 15.06914912438902 | 13.18867206436716 |
| H  | 11.80846652864611 | 12.65869676161256 | 16.72393901977540 |
| Sc | 13.71376697808648 | 17.24673438140375 | 14.56005973695993 |
| C  | 14.14712203548459 | 17.76762965824577 | 8.49073068539501  |
| H  | 13.52476848708381 | 19.73770886424871 | 16.95520592475728 |
| H  | 15.00929478822638 | 14.19735303506831 | 12.10346312667041 |
| H  | 9.81290543377408  | 14.96103941842600 | 13.24749765729765 |
| H  | 17.25056016753526 | 17.47156003149151 | 17.92591381514087 |
| N  | 12.79478993438279 | 19.23933539937147 | 14.49871432200476 |
| C  | 12.31691070246747 | 12.30034727225807 | 15.81592078671244 |
| C  | 13.81336156828193 | 16.64711322379470 | 9.25900709362817  |
| C  | 14.15727686863427 | 19.02894664513301 | 9.09365211742674  |
| N  | 13.17057625804341 | 18.12813926765456 | 12.57773675638882 |
| H  | 14.44260273035152 | 19.90865609978450 | 8.51296903730770  |
| C  | 13.83899596035112 | 19.17604672639844 | 10.44256984682252 |
| H  | 14.40876048071817 | 17.65734829904465 | 7.43710616156284  |
| C  | 10.72689993743299 | 14.86787418481413 | 12.64324498072196 |
| C  | 13.47944083559836 | 18.05516692435672 | 11.21708761207299 |
| H  | 13.21860321061445 | 15.91538845744823 | 11.20640130738989 |
| C  | 12.78071058556354 | 19.25764854693757 | 13.16612764237774 |
| H  | 13.80783220849769 | 15.65439808270440 | 8.80367762151331  |
| N  | 15.87179054239730 | 17.85469486573077 | 14.24614026443859 |
| H  | 12.48041503126133 | 20.15230663505781 | 12.59450072962543 |
| O  | 11.67051832943588 | 14.00372689165987 | 13.30419777926160 |
| H  | 11.56656374439804 | 12.03008146326748 | 15.05836746191749 |
| C  | 15.24291381737301 | 14.44328056111867 | 13.14929041891784 |
| O  | 14.16007494794319 | 15.19400916883419 | 13.72870174748310 |
| H  | 10.47758349901193 | 14.41006301182204 | 11.67691978520941 |
| Si | 12.73118527324095 | 14.58091803527058 | 14.42311040872172 |
| O  | 12.29425208708063 | 15.97119438966152 | 15.11888638468040 |
| O  | 13.22079540792112 | 13.30074731756619 | 15.32050993147919 |
| H  | 15.40494837753957 | 13.52093246218170 | 13.72262299483539 |
| C  | 16.03939319804608 | 17.95761549817708 | 15.55936122337590 |
| H  | 17.20287452872359 | 20.20532751919788 | 14.62733685500578 |
| C  | 12.26870835689127 | 20.27115172436489 | 15.28286117074186 |
| C  | 11.25869882202841 | 21.14234197270367 | 14.82946543266803 |
| C  | 10.77843012365491 | 22.15464468639339 | 15.66012630685224 |
| C  | 11.27477187222481 | 22.30722728659727 | 16.95803648843286 |
| C  | 12.25963381023324 | 21.42836119951895 | 17.42114970630532 |
| C  | 12.75329547320612 | 20.42081790514493 | 16.59595170653752 |
| H  | 10.82522775134784 | 21.00737777161059 | 13.83683024523748 |

|   |                    |                   |                   |
|---|--------------------|-------------------|-------------------|
| H | 9.99237998844477   | 22.81894882024298 | 15.29468007382873 |
| H | 10.88720083291513  | 23.09442559634797 | 17.60680311179208 |
| H | 12.64877109341492  | 21.52729878162683 | 18.43655584306803 |
| C | 16.678240184444037 | 18.54367691740417 | 13.33272276299048 |
| C | 16.79777494697885  | 18.02790706463815 | 12.02886149640277 |
| C | 17.57342231718263  | 18.68128097551808 | 11.07484442828825 |
| C | 18.24722061236234  | 19.86345185033754 | 11.39807030210124 |
| C | 18.12105772010783  | 20.39274657394433 | 12.68595433905225 |
| C | 17.33655872084429  | 19.75040825011745 | 13.64401866439975 |
| H | 16.26116795595771  | 17.11381698708145 | 11.77237982309699 |
| H | 17.64369157308525  | 18.26736367273826 | 10.06710211213785 |
| H | 18.85130784518669  | 20.37753248410873 | 10.64854258323650 |
| H | 18.62051835376809  | 21.32947559226223 | 12.94273637828396 |
| C | 15.09087923134177  | 17.36388258487601 | 17.69233996674933 |
| C | 13.87356537319396  | 17.19822666259163 | 18.38155757609462 |
| C | 13.85262808597845  | 17.10448412249988 | 19.77093567317540 |
| C | 15.04148101789381  | 17.16821370354077 | 20.50533558007920 |
| C | 16.25533378941726  | 17.31127922016611 | 19.82684935171546 |
| C | 16.28821251541980  | 17.39999575824449 | 18.43536432682065 |
| H | 12.94699845779267  | 17.14035719956896 | 17.80644264433283 |
| H | 12.89763909911142  | 16.97957373494133 | 20.28539017502046 |
| H | 15.02397761375724  | 17.09315695475397 | 21.59383636721335 |
| H | 17.19297027509141  | 17.33908639218193 | 20.38622639659691 |

#### 4. Supplementary References

1 M. Bak and N. C. Nielsen, REPULSION, A Novel Approach to Efficient Powder Averaging in Solid-State NMR, *J. Magn. Reson.*, 1997, **125**, 132–139.

2 M. H. Levitt, *Spin Dynamics: Basics of Nuclear Magnetic Resonance*, Wiley, 2nd edn., 2008.
